# Supplementary material for: The Uluzzian and Châtelperronian: No Technological Affinity in a Shared Chronological Framework
Source: Springer Nature journal article supplement (doi:10.1007/s41982-024-00202-1), 2025-01-04
Supplement: MOESM1 [file 41982_2024_202_MOESM1_ESM.xlsx]

## Sheet: Chatelperronian
Industry	Country	Site	Uncalibrated	Error	Code	Single/weighted	Type	d13C	C/N Ratio	% Collagen	mg collagen	Pretreatment	Sample	Description	Reference
Châtelperronian	France	Cassenade	36660	750	OxA-31477	Single	AMS	-19.79	3.3	2.3	13.66	Ultrafiltration	cut-marked bone	K52-30	Discamps et al., 2020
Châtelperronian	France	Grotte du Renne	35500	216	EVA-29	Single	AMS	-20.9	3.2	1.7	8.5	Ultrafiltration	cut-marked bone	61.Z11(213)	Hublin et al., 2012
Châtelperronian	France	Grotte du Renne	35380	390	EVA-54	Single	AMS	-18.5	3.4	2.2	11	Ultrafiltration	bone	59.Y10(50) "Later CP"	Hublin et al., 2012
Châtelperronian	France	Grotte du Renne	36630	452	EVA-55	Single	AMS	-19.3	3.2	1.2	6	Ultrafiltration	cut-marked bone	Arcy VIII 59.C15 (36)	Hublin et al., 2012
Châtelperronian	France	Grotte du Renne	37710	533	EVA-56	Single	AMS	-20.4	3.2	1.4	7	Ultrafiltration	cut-marked bone	Arcy VIII 58.C8 (92)	Hublin et al., 2012
Châtelperronian	France	Grotte du Renne	38730	333	EVA-41	Single	AMS	-19.1	3.2	2.5	12.5	Ultrafiltration	cut-marked bone	Arcy Xa A12 (75)	Hublin et al., 2012
Châtelperronian	France	Grotte du Renne	39390	334	EVA-26	Single	AMS	-18.7	3.2	4	20	Ultrafiltration	cut-marked bone	Arcy Xb1 61.Z11 (180)	Hublin et al., 2012
Châtelperronian	France	Grotte du Renne	40520	389	EVA-34	Single	AMS	-19	3.2	4.5	22.5	Ultrafiltration	cut-marked bone	Arcy IXb B13(110)	Hublin et al., 2012
Châtelperronian	France	Grotte du Renne	40970	424	EVA-33	Single	AMS	-18.7	3.1	4.4	22	Ultrafiltration	cut-marked bone	Arcy IXb Y13 (43)	Hublin et al., 2012
Châtelperronian	France	La Ferrassie	36590	390	MAMS-25522	Single	AMS	not available	3.3	2	10	Ultrafiltration	Equus	K3-3204	Talamo et al., 2020
Châtelperronian	France	La Ferrassie	37380	390	MAMS-16373	Single	AMS	not available	3.2	2.5	12.5	Ultrafiltration	bone	I4-219	Talamo et al., 2020
Châtelperronian	France	La Ferrassie	39000	510	MAMS-25523	Single	AMS	not available	3.3	2.4	12	Ultrafiltration	unknown bone	K3-3184	Talamo et al., 2020
Châtelperronian	France	La Ferrassie	40890	500	MAMS-21206	Single	AMS	not available	3.2	3	15	Ultrafiltration	unknown bone	L3-926	Talamo et al., 2020
Châtelperronian	France	La Ferrassie	40770	650	MAMS-25524	Single	AMS	not available	3.2	2.6	13	Ultrafiltration	unknown bone	K3-2953	Talamo et al., 2020
Châtelperronian	Spain	La Guelga	40300	1200	OxA-27958	Single	AMS	-20.5	3.1	3.6	22.1	Ultrafiltration	bone	Level 2 Zona D	Higham et al., 2014
Châtelperronian	France	La Quina Aval	38100	900	OxA-21707	Single	AMS	-18.5	3.3	5	25.8	Ultrafiltration	R. tarandus femoral shaft with cutmarks	LQa2 C5 couche B2	Higham et al., 2014
Châtelperronian	France	La Quina Aval	39400	1000	OxA-21706	Single	AMS	-18.2	3.4	3.8	18.7	Ultrafiltration	R. tarandus metatarsal, scraped	LQa1 C5 couche B3	Higham et al., 2014
Châtelperronian	Spain	Labeko Koba	37400	800	OxA-22560	Single	AMS	-20.6	3.2	1	8.5	Ultrafiltration	Cervus elaphus radius cut marked	IX, LAB-23	Higham et al., 2014
Châtelperronian	Spain	Labeko Koba	37800	900	OxA-22563	Single	AMS	-20.2	3.1	2.6	17.7	Ultrafiltration	Cervus elaphus, metatarsal cutmarks and gnaw marks	IX, LAB-27	Higham et al., 2014
Châtelperronian	Spain	Labeko Koba	38000	900	OxA-22561	Single	AMS	-20.3	3.2	1.3	12.5	Ultrafiltration	Cervus elaphus, distal humerus cut marked	IX, LAB-24	Higham et al., 2014
Châtelperronian	Spain	Labeko Koba	38100	900	OxA-22562	Single	AMS	-20.1	3.1	1.3	11.2	Ultrafiltration	Cut marked Cervus elaphus (juvenile), humerus	IX, LAB-26	Higham et al., 2014
Châtelperronian	France	Les Cottes	36230	210	EVA-11 and OxA-V-2381-53	Weighted	AMS	-19.1	3.2	2.1	10.5	Ultrafiltration	cut-marked bone	X6-205	Talamo et al., 2011
Châtelperronian	France	Les Cottes	36410	450	OxA-V-2381-53	Single	AMS	-19.1	3.2	2.1	10.5	Ultrafiltration	cut-marked bone	X6-205	Talamo et al., 2011
Châtelperronian	France	Les Cottes	38100	210	EVA-13 and MAMS-10824 and OxA-V-2382-46	Weighted	AMS	-19.9	3.2	3.3	16.5	Ultrafiltration	cut-marked bone	Z4-3368, 13668	Talamo et al., 2011
Châtelperronian	France	Les Cottes	37360	610	EVA-12 and MAMS-10823 and OxA-V-2382-45	Weighted	AMS	-21.6	3.2	1.9	9.5	Ultrafiltration	carnivore-marked bone	Z4-3286, 13667	Talamo et al., 2011
Châtelperronian	France	Les Cottes	38540	270	MAMS-10803	Weighted	AMS	-20.4	3.4	3.4	17	Ultrafiltration	cut-marked bone	Z4-1258, 9695	Talamo et al., 2011
Châtelperronian	France	Les Cottes	41070	300	EVA-21 and OxA-V-2381-50	Weighted	AMS	-20.4	3.2	1.7	8.5	Ultrafiltration	cut-marked bone	Y6-979, 13662	Talamo et al., 2011
Châtelperronian	France	Les Cottes	42360	370	EVA-5 and OxA-V-2381-51	Weighted	AMS	-18.9	3.2	1	5	Ultrafiltration	cut-marked bone	Y5-2785, 13664	Talamo et al., 2011

## Sheet: Uluzzian
Industry	Country	Site	Uncalibrated	Error	Code	Type	Pretreatment	Sample	Description	Reference
Uluzzian	Italy	Riparo Broion	38900	1000	OxA-35527	AMS 14C	Ultrafiltration	bone	Layer_1g	Peresani et al. 2019
Uluzzian	Italy	Castelcivita	36120	360	OxA-22622	AMS 14C	ABOx-SC	charcoal	RSA”, 11	Higham et al. 2024
Uluzzian	Italy	Castelcivita	38300	1000	OxA-X-2770-41	AMS 14C	Ultrafiltration	bone	RSA” lower 11 F14 II	Higham et al. 2024
Uluzzian	Italy	Castelcivita	38300	1000	OxA-X-2770-40	AMS 14C	Ultrafiltration	bone	RSA” lower 11 F14 II	Higham et al. 2024
Uluzzian	Italy	Castelcivita	38000	900	OxA-X-2770-39	AMS 14C	Ultrafiltration	bone	RSA” lower 11 F14 IV	Higham et al. 2024
Uluzzian	Italy	Castelcivita	37500	900	OxA-37247	AMS 14C	Ultrafiltration	bone	RSA” upper 12 F14 I	Higham et al. 2024
Uluzzian	Italy	Castelcivita	38500	1000	OxA-37246	AMS 14C	Ultrafiltration	bone	RSA” upper 12 F14 I	Higham et al. 2024
Uluzzian	Italy	Castelcivita	36220	750	OxA-39604	AMS 14C	Ultrafiltration	bone	RSA” upper 12 G14 IV	Higham et al. 2024
Uluzzian	Italy	Castelcivita	37800	900	OxA-37245	AMS 14C	Ultrafiltration	bone	RSA” upper 12 G14 IV	Higham et al. 2024
Uluzzian	Italy	Castelcivita	36000	700	OxA-X-2733-13*	AMS 14C	Ultrafiltration	bone	RPI lower 12 G13 II	Higham et al. 2024
Uluzzian	Italy	Castelcivita	35100	1100	OxA-X-2772-7*	AMS 14C	Dated using compound-speciﬁc hydroxyproline dating	“	“	Higham et al. 2024
Uluzzian	Italy	Castelcivita	36480	390	OxA-X-2698-46	AMS 14C	AOx-SC	charcoal	Base RSA”	Higham et al. 2024
Uluzzian	Italy	Castelcivita	37400	900	OxA-37251	AMS 14C	Ultrafiltration	bone	RPI 13 G13	Higham et al. 2024
Uluzzian	Italy	Castelcivita	38700	1000	OxA-37250	AMS 14C	Ultrafiltration	bone	RPI 13 G13	Higham et al. 2024
Uluzzian	Italy	Castelcivita	37730	910	OxA-39605	AMS 14C	Ultrafiltration	bone	RPI upper 14 G13 II	Higham et al. 2024
Uluzzian	Italy	Castelcivita	39300	1100	OxA-37244	AMS 14C	Ultrafiltration	bone	RPI upper 14 G14 II	Higham et al. 2024
Uluzzian	Italy	Castelcivita	38600	1000	OxA-37243	AMS 14C	Ultrafiltration	bone	RPI upper 14 G14 II	Higham et al. 2024
Uluzzian	Italy	Castelcivita	39100	1100	OxA-37252	AMS 14C	Ultrafiltration	bone	RPI upper 14 G13 II	Higham et al. 2024
Uluzzian	Italy	Castelcivita	38600	1000	OxA-37254	AMS 14C	Ultrafiltration	bone	PIE lower 15 - upper 16 H14 I	Higham et al. 2024
Uluzzian	Italy	Castelcivita	38600	1100	OxA-37253	AMS 14C	Ultrafiltration	bone	PIE lower 15 - upper 16 H14 I	Higham et al. 2024
Uluzzian	Italy	Castelcivita	38500	1000	OxA-37249	AMS 14C	Ultrafiltration	bone	RSI lower 16 H13 I	Higham et al. 2024
Uluzzian	Italy	Castelcivita	38500	1000	OxA-37248	AMS 14C	Ultrafiltration	bone	RSI lower 16 H13 I	Higham et al. 2024
Uluzzian	Italy	Cavallo	35080	230	OxA/OxA-X-19254	AMS 14C	Ultrafiltration	shell	Cvl 2-Layer D	Higham et al. 2024; Benazzi et al. 2011
Uluzzian	Italy	Cavallo	36260	250	OxA/OxA-X-19255	AMS 14C	Ultrafiltration	shell	Cvl 4-Layer D	Higham et al. 2024; Benazzi et al. 2011
Uluzzian	Italy	Cavallo	36780	310	OxA/OxA-X-20631	AMS 14C	Ultrafiltration	shell	Cvl 11-Layer D	Higham et al. 2024; Benazzi et al. 2011
Uluzzian	Italy	Cavallo	42360	400	OxA/OxA-X-19257	AMS 14C	Ultrafiltration	shell	Cvl 6	Higham et al. 2024; Benazzi et al. 2011
Uluzzian	Italy	Cavallo	36000	400	OxA/OxA-X-19258	AMS 14C	Ultrafiltration	shell	Cvl 8-Layer D	Higham et al. 2024; Benazzi et al. 2011
Uluzzian	Italy	Cavallo	39060	310	OxA/OxA-X-19256*	AMS 14C	Ultrafiltration	shell	Cvl 5-Layer E-D	Higham et al. 2024; Benazzi et al. 2011
Uluzzian	Italy	Cavallo	38300	400	OxA/OxA-X-2280-16*	AMS 14C	Ultrafiltration	“	“	Higham et al. 2024; Benazzi et al. 2011
Uluzzian	Italy	Cavallo	40400	1900	OxA/OxA-X-40125*	AMS 14C	Ultrafiltration	charcoal	CAV12-Layer E-D	Higham et al. 2024
Uluzzian	Italy	Cavallo	40900	2100	OxA/OxA-X-40126*	AMS 14C	Ultrafiltration	“	“	Higham et al. 2024
Uluzzian	Italy	Cavallo	39990	340	OxA/OxA-X-19242	AMS 14C	Ultrafiltration	shell	Cvl 3-Layer EII-I	Higham et al. 2024; Benazzi et al. 2011
Uluzzian	Italy	Cavallo	38150	450	OxA/OxA-X-40043	AMS 14C	Ultrafiltration	charcoal	CAV11-Layer EII-I	Higham et al. 2024
Uluzzian	Italy	Cavallo	40700	2100	OxA/OxA-X-40124	AMS 14C	Ultrafiltration	charcoal	CAV8-Layer EIII	Higham et al. 2024
Uluzzian	Italy	Cavallo	38730	480	OxA/OxA-X-40042	AMS 14C	Ultrafiltration	charcoal	CAV9-Layer EIII	Higham et al. 2024
Uluzzian	Italy	Cavallo	38450	470	OxA/OxA-X-40041	AMS 14C	Ultrafiltration	charcoal	CAV7-Layer EIII	Higham et al. 2024
Uluzzian	Italy	Cavallo	38600	2200	OxA/OxA-X-3070-15	AMS 14C	Ultrafiltration	charcoal	CAV10-Layer EIII	Higham et al. 2024
Uluzzian	Italy	Cavallo	38390	570	OxA/OxA-X-40040	AMS 14C	Ultrafiltration	charcoal	CAV6-Layer EIII	Higham et al. 2024
Uluzzian	Italy	Cavallo	39540	590	OxA/OxA-X-40039	AMS 14C	Ultrafiltration	charcoal	CAV5-Layer EIII	Higham et al. 2024
Uluzzian	Italy	Cavallo	38530	470	OxA/OxA-X-39973	AMS 14C	Ultrafiltration	charcoal	CAV3-Layer EIII	Higham et al. 2024
Uluzzian	Italy	Cavallo	38110	580	OxA/OxA-X-39972	AMS 14C	Ultrafiltration	charcoal	CAV1-Layer EIII	Higham et al. 2024
Uluzzian	Italy	Cavallo	38300	1700	OxA/OxA-X-41397	AMS 14C	Ultrafiltration	bone	CV698-Layer EIII	Higham et al. 2024
Uluzzian	Italy	Cavallo	37600	1900	OxA/OxA-X-3125-18	AMS 14C	Ultrafiltration	bone	CV327-Layer EIII	Higham et al. 2024
Uluzzian	Italy	Cavallo	37600	1700	OxA/OxA-X-3125-17	AMS 14C	Ultrafiltration	bone	CV384-Layer EIII	Higham et al. 2024
Uluzzian	Italy	Cavallo	36200	1400	OxA/OxA-X-3125-9	AMS 14C	Ultrafiltration	bone	CV632-Layer EIII	Higham et al. 2024
*same sample dated two times
