# Supplementary material for: The Uluzzian and Châtelperronian: No Technological Affinity in a Shared Chronological Framework
Source: Springer Nature journal article supplement (doi:10.1007/s41982-024-00202-1), 2025-01-04
Supplement: MOESM2 [file 41982_2024_202_MOESM2_ESM.docx]

**SI2. OxCal script used to produce KDE models**

Plot()

{

KDE_Model("Uluzzian", N(0,1), U(0,1))

{

Curve("IntCal20","intcal20.14c");

Curve("Marine20","Marine20.14c");

Delta_R("Undefined Local Marine",U(-500,500));

Curve("=IntCal20");

R_F14C("OxA-37248", 0.00829, 0.00102);

R_F14C("OxA-37249", 0.00828, 0.00104);

R_F14C("OxA-37253", 0.00818, 0.00109);

R_F14C("OxA-37254", 0.00818, 0.00102);

R_F14C("OxA-37252", 0.00768, 0.00101);

R_F14C("OxA-37243", 0.00817, 0.001);

R_F14C("OxA-37244", 0.00748, 0.00099);

R_F14C("OxA-39605", 0.0091218, 0.00103147);

R_F14C("OxA-37250", 0.00812, 0.00106);

R_F14C("OxA-37251", 0.00947, 0.00105);

R_F14C("OxA-X-2733-13", 0.0113, 0.00101);

R_F14C("OxA-X-2772-7", 0.01263, 0.00176);

R_F14C("OxA-X-2698-46", 0.01067, 0.00052);

R_F14C("OxA-37245", 0.00903, 0.00102);

R_F14C("OxA-45409", 0.0110124, 0.00102767);

R_F14C("OxA-37246", 0.0083, 0.00106);

R_F14C("OxA-37247", 0.00935, 0.00104);

R_F14C("OxA-X-2770-39", 0.00885, 0.00103);

R_F14C("OxA-X-2770-40", 0.00855, 0.00104);

R_F14C("OxA-X-2770-41", 0.00848, 0.00104);

R_F14C("OxA-22622", 0.01114, 0.0005);

R_F14C("OxA-X-3125-9", 0.0110494, 0.0019649);

R_F14C("OxA-X-3125-16", 0.0124355, 0.00184085);

R_F14C("OxA-X-3125-17", 0.00928381, 0.00194549);

R_F14C("OxA-X-3125-18", 0.00929033, 0.00217918);

R_F14C("OxA-41397", 0.00846092, 0.00183264);

R_F14C("OxA-39972",0.00870,0.00063);

R_F14C("OxA-39973",0.00826,0.00049);

R_F14C("OxA-40039", 0.00728, 0.00053);

R_F14C("OxA-40040", 0.00840, 0.00060);

R_F14C("OxA-X-3070-15", 0.00819, 0.00227);

R_F14C("OxA-40041", 0.00834, 0.00049);

R_F14C("OxA-40042", 0.00805, 0.00048);

R_F14C("OxA-40124", 0.00630, 0.00161);

R_F14C("OxA-40043",0.00866,0.00049);

R_F14C("OxA-40125", 0.00653, 0.00153);

R_F14C("OxA-40126", 0.00612, 0.00161);

R_Date("OxA-35527",38900,1000);

Curve("=Marine20");

Delta_R("=Undefined Local Marine");

R_F14C("OxA-19242", 0.00689, 0.00029);

R_F14C("OxA-19256", 0.00773, 0.0003);

R_F14C("OxA-X-2280-16", 0.00849, 0.00042);

R_F14C("OxA-19258", 0.01131, 0.00057);

R_F14C("OxA-19257", 0.00513, 0.00025);

R_F14C("OxA-20631", 0.01027, 0.00039);

R_F14C("OxA-19255", 0.01095, 0.00035);

R_F14C("OxA-19254", 0.01269, 0.00036);

};

};

Plot()

{

KDE_Model("Chatelperronian")

{

Curve("IntCal20","intcal20.14c");

Curve("=IntCal20");

R_Date("La Guelga OxA-27958",40300,1200);

R_Date("Les Cottés OxA-V-2381-51",42360,370);

R_Date("La Ferrassie MAMS-25524",40770,650);

R_Date("La Ferrassie MAMS-21206",40890,500);

R_Date("Grotte du Renne EVA-33",40970,424);

R_Date("La Quina-Aval OxA-21706",39400,1000);

R_Date("Les Cottés OxA-V-2381-50*",41070,300);

R_Date("Grotte du Renne EVA-34",40520,389);

R_Date("La Quina-Aval OxA-21707",38100,900);

R_Date("Labeko Koba OxA-22562",38100,900);

R_Date("Labeko Koba OxA-22561",38000,900);

R_Date("La Ferrassie MAMS-25523",39000,510);

R_Date("Labeko Koba OxA-22563",37800,900);

R_Date("Grotte du Renne EVA-26",39390,334);

R_Date("Grotte du Renne EVA-41",38730,333);

R_Date("Labeko Koba OxA-22560",37400,800);

R_Date("Les Cottés MAMS-10803*",38540,270);

R_Date("Grotte du Renne EVA-56",37710,533);

R_Date("Les Cottés EVA-12*",37360,610);

R_Date("Les Cottés EVA-13*",38100,210);

R_Date("Cassenade OxA-31477",36660,750);

R_Date("La Ferrassie MAMS-16373",37380,390);

R_Date("La Ferrassie MAMS-25522",36590,390);

R_Date("Les Cottés OxA-V-2381-53*",36410,450);

R_Date("Les Cottés EVA-11*",36230,210);

R_Date("Grotte du Renne EVA-55",36630,452);

R_Date("Grotte du Renne EVA-54",35380,390);

R_Date("Grotte du Renne EVA-29",35500,216);

};

};
