# Supplementary material for: The Uluzzian and Châtelperronian: No Technological Affinity in a Shared Chronological Framework
Source: Springer Nature journal article supplement (doi:10.1007/s41982-024-00202-1), 2025-01-04
Supplement: MOESM3 [file 41982_2024_202_MOESM3_ESM.docx]

**Grotta di Castelcivita (Castelcivita, Salerno, Campania, Southern Italy)**

Systematic research at Grotta di Castelcivita began in 1975, led by P. Gambassini of the University of Siena, and continued until 1988 over an area of 14 m² (Gambassini, 1997). The archaeological succession is about 2.6 m thick. Research at Grotta di Castelcivita was resumed by the University of Siena under the direction of two of the authors (A. Ronchitelli and A. Moroni) in 2015 and is ongoing.

The main sedimentological, stratigraphic, and archaeological features are listed here in stratigraphic order (Arrighi et al., 2020; Falcucci et al., 2024; Gambassini, 1997; Rossini et al., 2022). The sedimentary descriptions are based on Fumanal (1997) and new observations conducted within a geological study performed by Ivan Martini still to be published.

- **Layer cgr (cemented grey; spits 33-29), Late Mousterian:** This layer, at the base of the succession, consists of rockfall deposits formed by large limestone blocks that collapsed from the cave vault and walls. Fine-grained sediments are infiltrated within the blocks, forming a thick level (about 2 m) that possibly lies on the cave bedrock.
- **Layers upper cgr and gar (cemented grey and yellow clay; spits 28-24), Late Mousterian:** These layers consist of fine-grained sediments (silt and clay) with scattered debris and clasts, forming cemented layers in some places. These deposits incorporate pyroclastic materials and contain large limestone blocks, especially at the top of layer gar.
- **Layer lower rsi (lower red; spits 23-lower 18), Late Mousterian:** This layer is composed of fine-grained sediments (clay, silt, and fine sand) with scattered debris and faint plane-parallel lamination. It also contains cemented layers.
- **Layers upper rsi, pie, rpi, and rsa" (lower red, stones, red with stones, and red sand; spits upper 18-11), Uluzzian:** These layers are discontinuous from the previous ones due to a change in sedimentation, becoming predominantly allochthonous with only scarce breakdown sediments. According to Fumanal and Gambassini (1997, pp. 23 and 109), “the contact plane between Mousterian and Uluzzian is situated within spit 18. The transition between the two cultural horizons is marked by a clear-cut sedimentological change associated with erosive episodes, indicating a hiatus in the stratigraphic sequence […] the lithic industry contains just eight tools.” These deposits, approximately 80 cm thick, are generally made of fine-grained materials (silt and clay), occasionally mixed with more coarse-grained materials like sand and granules, and contain common breakdown debris.
- **Layer rsa' (red sand; spits 10 – 8), Protoaurignacian with marginally backed bladelets (Dufour):** This layer consists of fine-grained reddish sediments dominated by silt and sand with scattered debris and rounded clasts up to 2-3 cm in diameter, indicating a completely allochthonous origin for these sediments. Layers rsa’ and rsa’’ are almost identical sedimentologically but differ in material culture.
- **Layer gic (cemented yellow; spits upper 8– 7), Early Aurignacian with micro-points of the Castelcivita type** (Falcucci et al. 2024)**:** This layer is composed of yellowish fine to medium-grained sand, locally rich in a muddy matrix, with common rounded clasts in the lower part and scarce debris fragments. Some clasts are made of poorly consolidated pyroclastic material, and the deposits are slightly to firmly cemented.
- **Layer ars (orange sand; spit 6-4), Early Aurignacian with micro-points of the Castelcivita type** (Falcucci et al. 2024): This layer consists of reddish to yellowish fine-grained sand with a silty matrix, containing small pyroclastic clasts.
- **The top of the anthropogenic sequence:** This is represented by a multilayered flowstone that sealed the entire deposit, reaching the cave ceiling. The flowstone layers are separated by thin strata of fine to medium-grained sand, composed of pyroclastic sediments attributed to the Y5 (Campanian Ignimbrite) eruption, dated at 39.85 ± 0.14 ka BP (Giaccio et al., 2017).

**Grotta del Cavallo (Nardò, Lecce, Apulia, Southern Italy)**

Research at Grotta del Cavallo began in the 1960s under A. Palma di Cesnola from the University of Siena, spanning from 1961 to 1966 and resuming from 1976 to 1978. Since then, the University of Siena has continued the work, with P. Gambassini focusing on the Uluzzian layers from 1978 to 1986, and L. Sarti and F. Martini on the Mousterian and Romanellian layers from 1978 to the present (Sarti, 1987-1988). Although the 1961-1966 excavations at Grotta del Cavallo were intended as a test trench (Palma di Cesnola, 1965), Palma di Cesnola meticulously respected the stratigraphy. He used lithostratigraphic macro-units (A, B, C, etc.), which were further divided into layers (EI, EII, EIII, etc.) and sub-layers (CIa, DIa, DIb, etc.) to record any meaningful sedimentological variations

The site's extensive archaeological deposits span a significant time period (Palma di Cesnola, 1967; Romagnoli et al., 2016)., including:

- Mousterian (layers N-H)
- Late Mousterian (layer F)
- Uluzzian (layers E, D)
- Final Upper Palaeolithic-Romanellian (layer B)
- Holocene (layer A)

The Uluzzian deposit is capped by two tephra layers (CII and CI), distinguished by their distinct colours and a combined maximum thickness of 60 cm, and is superimposed on another tephra, the Fa. Volcanic layers CII and Fa serve as key chronological markers: Fa at the base, attributed to tephra Y-6 (Green Tuff of Pantelleria) dated at 45.5 ± 1.0 ka (Zanchetta et al., 2018), and CII at the top, attributed to tephra Y-5 (Campanian Ignimbrite) dated at 39.85 ± 0.14 ka (Giaccio et al., 2017). Based on the stratigraphic sequence, Palma di Cesnola divided the Uluzzian into three main chrono-cultural phases. The most recent phase, the Final Uluzzian, corresponds to layers DII (spits D4 to D3) and layer DI (spits D2 to D1). This is preceded by a transitional spit (named E-D corresponding to spit E1) and by the "evolved phase," found in layers EII-I (spits E4 to E2). The oldest phase, the "Archaic Uluzzian," is in layer EIII (spits E7 to E5), which overlies (from top to bottom) layers Fs, Fa and FI (Mousterian). The presence of dripping pools on top of FI (Gambassini, fieldwork notes, 1981) suggests a depositional hiatus between these layers, indicating a period of human absence. In 1964, two deciduous teeth (Cavallo B and Cavallo C) were found in the earliest Uluzzian layer (EIII – Messeri and Palma di Cesnola, 1976, p. 7). Cavallo B was discovered in spits 7 within a hearth at the base of layer EIII, whereas Cavallo C was found in spits 5, approximately 15-20 cm higher in the same layer (Palma di Cesnola and Messeri, 1967, p. 251).

In September 2019, Adriana Moroni, Paolo Boscato and Francesco Boschin returned to Grotta del Cavallo to verify the stratigraphic sequence recognized in the last century (Higham et al., 2024). They explored the undisturbed Uluzzian deposit from the top of layer CI to the top of layer F by opening a small test trench. During the excavation, samples were taken for aDNA from sediments and 14C dating; lithics, faunal remains, and shell ornaments were recovered from all layers. Notably, the archaeological and sedimentological succession matched the reports by Palma di Cesnola, confirming the stratigraphic observations from the '60s.

The trench, 50 x 30 cm wide, was opened in square L12, sector II, in an area where the Romanellian layers had already been excavated and the Uluzzian deposit was exposed. The sedimentological succession from top to bottom is as follows:

- **Unit 1:** Reddish volcanic sediments (15-30 cm thick) lying on unit 2 through an unconformity. Some erosional pockets penetrate the underlying layer. Sterile. Corresponds to the lower part of CI of the old excavations.
- **Unit 2:** Slightly cemented silver-grey volcanic sediments (5-20 cm thick) lying on unit 3 through a sharp unconformity. Sterile. Corresponds to layer CII (Campanian Ignimbrite) of the old excavations.
- **Unit 3:** Strongly cemented reddish sandy silt (12-17 cm thick). Corresponds to layer DI of the old excavations.
- **Unit 4:** Reddish sandy silt sediment, looser than unit 3 (about 15 cm thick). Corresponds to layer DII of the old excavations.
- **Unit 5:** Dark grey-brown sand (15-20 cm thick). Corresponds to layer EI of the old excavations.
- **Unit 6:** Grey-brown sandy silt (10-15 cm thick). Corresponds to layer EII of the old excavations.
- **Unit 7:** Very loose grey-brown sand with abundant clasts (27-35 cm thick), lying through an unconformity on the underlying layer (FI of the old excavations). Corresponds to layer EIII of the old excavations.

In 2019, layers Fs and Fa were not found because the trench was opened toward the bottom of the cave, where these two layers are absent.

**Les Cottés (Saint-Pierre-de-Maille, Vienne, west-central France)**

Les Cottés is one of the few sites that preserves every cultural unit known for the transition from the Middle to Upper Palaeolithic in this area, including Châtelperronian and Protoaurignacian deposits. The cave is situated at the south-western edge of the Parisian basin, near to the Aquitane basin. Initially discovered in the late nineteenth century, the site was first excavated by Rochebrune (1881) and subsequently by Pradel (1961) who identified a stratigraphic sequence including Mousterian, Châtelperronian, Early Aurignacian, and Gravettian layers. In 2006, a new excavation program began directed by M. Soressi, employing a multidisciplinary approach that includes micromorphological, taponomic, faunal, and lithic studies – as well as OSL and radiocarbon dating programs (Soressi et al., 2010; Talamo et al., 2012).

The new excavations were focused on the ~13m long section (north, south and east sections) exposed by Pradel from his original excavation area during the 1950s. The sequence was shown to comprise five main archaeological horizons: one Mousterian (US08), one Châtelperronian (US06), one Proto-Aurignacian (US04 lower), an Early Aurignacian (US04 upper), and a late Aurignacian (US02). The Mousterian and Châtelperronian layers at Les Cottés are separated from the Protoaurignacian layers by a low-density deposit spanning approximately 1,000 years (Soressi et al., 2010). Radiometric dating of bones and sediments indicates that the site was occupied from at least 45 kya cal BP until around 35,000 kya cal BP (Talamo et al., 2012; Jacobs et al., 2015). Detailed descriptions of the chronology, cultural sequence, fauna, and sedimentological observations are available in the stand-alone publications (Talamo et al., 2012; Jacobs et al., 2015; Rendu et al., 2019; Welker et al., 2015; Soressi et al., 2010).

**Grande-Roche-de-la-Plematrie, Quinçay (Vienne, west-central France)**

The Grande-Roche-de-la-Plematrie at Quinçay, France (hereafter Quinçay) is a limestone cave located in a dry tributary to the Auxance river, about 15 km north-west of Poitiers, in the Vienne region of west-central France (Lévêque and Miskovski, 1983). Discovered in 1952, it is a ~20m deep and ~13m wide karstic chamber which was excavated over a 22 year period by F. Lévêque from 1968 to 1990. The Lévêque excavations covered roughly 50 square meters, focusing primarily on the inside of the cave where the deposits had not been affected by clandestine activities which affected the deposits located in and around the cave entrance. Research at Quinçay was resumed by M. Soressi in 2020, and is ongoing. The main sedimentological, stratigraphic, and archaeological features are listed here in stratigraphic order. The descriptions are based on Lévêque and Miskovski (1983).

During the Lévêque excavations, the site was divided into two areas – the central zone and the anterior zone, the latter of which was associated with large limestone slabs which had sealed the underlying deposits. The naming of stratigraphic divisions generally follows this division, with stratigraphic units in the front area starting with an ‘E’ (Ensemble) and in the back area with an ’S’ (Série). To gain access to the sealed deposits associated with the former, breaking and removing the large slabs was the primary focus of the initial excavation seasons. The deposits in the back of the cave (Série) were not sealed by roof collapse, and some partially in situ deposits correlating to more recent periods were recognized in this part of the cave – associated with a low number of artefacts (seven geometric microliths and ten ceramic fragments) (Lévêque, 1997).

The site was excavated according to quite exceptional standards for the time, and a detailed explanation of the specific excavation techniques used was later published by Lévêque (2002). To summarise, the site was excavated by sub-layer and the position of every diagnostic lithic artefact and all identifiable faunal elements was recorded in three dimensions with the use of a traditional grid system and a three pole levelling system. Each square was sub-divided into nine 33 by 33 cm sub-squares which were excavated in 5 or 10 cm spits and followed the natural orientation of each deposit (ibid.). All artefacts recovered during this process were stored in plastic bags – referenced to their original sub-layer, sub-square and respective spit. In addition, a notebook was kept for each excavated square – listing the 3D coordinates of all plotted artefacts, artefact descriptions, sedimentary characteristics, and features. The excavations revealed a series of stratified Châtelperronian deposits.

The stratigraphy of the cave was divided based on differences in sediment colour, texture, and general structure (Lévêque and Miskovski, 1983). The sequence was interpreted as consisting of four main archaeological-bearing layers distributed over a roughly 1.5m thick deposit – each of which was further subdivided into several sub-layers. Although the two excavation areas were never physically connected, the Série and Ensemble sequences were correlated by the original excavator based on sedimentary features and characteristics. A description of the stratigraphy and correlations are outlined here, and a detailed description of the lithic technologies is available in Roussel et al. (2016). From the uppermost to the lowermost:

- **Ensemble Jaune (Ej)** *-* This is a yellow sandy-clay deposit which sometimes appears as orange and contains numerous calcareous elements. It is sub-divided into an upper sub-layer (EJ-o) which is characterized by a pale yellow colour and evidence of damage on associated bone and lithic elements resulting from cryoturbation, and a lower sub-layer (EJ-m) which is darker in colour and associated with a lower quantity of artefacts. In the Serie sequence, this unit is designated as **SJ** and is not divided into discrete sub-layers.
- **Ensemble Marron (Em) -**This is a dark coloured sandy-clay deposit in which the sediment appears more powdery at the base. It is further subdivided into a upper sub-layer characterised by a brown-orange colour and calcareous blocks of varying sizes (EM-o), a middle sub-layer of a reddish colour which is interpreted as containing hearths and traces of charcoal (EM-f), and a lower sub-layer of a brownish-yellow clay with a reduced presence of calcareous elements (EM-j). In the Serie sequence, this unit is divided into an upper orange sandy-clay horizon **(SM)** which correlates to EM-o, a sub-layer in which hearths are prominent and artefact density is high **(SFS)** which correlates to EM-f, and a yellow sandy-clay horizon **(SFJ)** which can be linked with EM-j.
- **Ensemble Noir (En)** - This unit is noted as being significantly different from the overlying layers due to its dark brown/black colour which is interpreted as relating to the presence of numerous hearths. Additionally, lithic artefacts are highly abundant. In the Serie sequence, this unit corresponds to a layer with analogous sedimentary characteristics and features **(SFI)**.
- **Ensemble Gris (Eg) -**This is a fine grained horizon which is interpreted as deriving from the decomposition of calcareous elements and has a distinctive grey colour. Based on slight changes in sedimentary characteristics, it was further divided into EG-f, EG-c, and EG-b. In the Serie sequence, this unit corresponds to a similarly distinctive layer which is found towards the base of the sequence, but is not further sub-divided **(SG)**.
- **Ensemble Rouge (Er)** - This is a red, sandy layer which is found at the bottom of the sequence and overlays a calcareous collapse which may in fact correspond to bedrock. It is noted as being effectively sterile with the exception of a few flint nodules. In the Serie sequence, this unit is designated **SR**.

In addition, two thin lenses were identified at the top of the Série sequence which were localised to the back of the cave, and they do not appear in the Ensemble sequence **(SB and SO)**. They were comparatively low-density in terms of archaeological material, preserving a relatively small assemblage of non-diagnostic stone artefacts. As a result, they were never designated a cultural attribution.

The lowermost archaeological unit, EG and SG respectively, was initially interpreted as the original excavator as representing an “archaic Châtelperronian” industry, but has since been re-attributed to the MTA Type B (Roussel and Soressi, 2010). This unit is overlain by three Châtelperronian units (EN/SFI, EM/SF, and EJ/SJ). Although it was suggested by Lévêque as showing the diachronic evolution of the industry (from lowest to highest: typical Châtelperronian (En), evolved Châtelperronian (Em), regressive Châtelperronian (Ej) (Lévêque, 1987), these too have since been re-evaluated as representing a coherent Châtelperronian sequence (Roussel and Soressi, 2010; Roussel et al., 2016). The assemblage correlating with level En represents the richest Châtelperronian assemblage in terms of diagnostic archaeological material. Renewed research at the site, currently ongoing, is aimed at refining the chrono-cultural interpretation of the sequence, providing an absolute radiometric chronology, and describing the site-formation processes.

**References**

Arrighi, S., Marciani, G., Rossini, M., Pereira Santos, M. C., Fiorini, A., Martini, I., et al. (2020a). Between the hammerstone and the anvil: bipolar knapping and other percussive activities in the late Mousterian and the Uluzzian of Grotta di Castelcivita (Italy). *Archaeological and Anthropological Sciences*, *12*(11), 271. https://doi.org/10.1007/s12520-020-01216-w

Falcucci, A., Arrighi, S., Spagnolo, V., Rossini, M., Higgins, O. A., Muttillo, B. et al. (2024). A pre-Campanian Ignimbrite techno-cultural shift in the Aurignacian sequence of Grotta di Castelcivita, southern Italy. *Scientific Reports*, *14*(1), 12783.

Fumanal, M.P., 1997. La cueva de Castelcivita. Estudio sedimentologico. In: Gambassini, P. (Ed.), Il Paleolitico Di Castelcivita Culture e Ambiente. Electa Napoli, Napoli, pp. 19–32.

Gambassini, P. (1997). *Il Paleolitico di Castelcivita: Culture e Ambiente*. *Electa*.

Giaccio, B., Niespolo, E. M., Pereira, A., Nomade, S., Renne, P. R., Albert, P. G., et al. (2017). First integrated tephrochronological record for the last ∼190 kyr from the Fucino Quaternary lacustrine succession, central Italy. *Quaternary Science Reviews*, *158*, 211–234. <https://doi.org/10.1016/j.quascirev.2017.01.004>

Higham, T., Frouin, M., Douka, K., Ronchitelli, A., Boscato, P., Benazzi, S., Crezzini, J., Spagnolo, V., McCarty, M., Marciani, G., Falcucci, A., Rossini, M., Arrighi, S., Dominici, C., Devièse, T., Schwenninger, J.-L., Martini, I., Moroni, A., Boschin, F. (2024). Chronometric Data and Stratigraphic Evidence Support Discontinuity Between Neanderthals and Early Homo Sapiens in the Italian Peninsula. Nat Commun 15, 8016 <https://doi.org/10.1038/s41467-024-51546-9>

Jacobs, Z., Li, B., Jankowski, N., Soressi, M., 2015. Testing of a single grain OSL chronology across the Middle to Upper Palaeolithic transition at Les Cottés (France). Journal of Archaeological Science. 54, 110–122.

Lévêque, F., Miskovski, J.C., 1983. Le Castelperronien dans son environnement géologique. Essai de synthèse à partir de l’étude lithostratigraphique du remplissage de la grotte de la Grande Roche de la Plématrie (Quinçay, Vienne) et d’autres dépôts actuellement mis au jour. L’Anthroplogie. 87, 369–391.

Lévêque, F., 1987. Les gisements castelperroniens de Quinçay et de Sainnt-Césaire: quelques comparaisons préliminaires. Stratigraphie et industries. In: Anonymous (Ed.), Préhistoire de Poitou-Charente: Problèmes Actuels. Actes Du 111e Congrès National Des Sociétés Savantes, Poitiers, 1986. Ministère de l’Education, Comité des Travaux Historiques et Scientifiques, Paris, pp. 91–98.

Lévêque, F., 1997. Le Passage du Paléolithique moyen au Paléolithique supérieur : Données stratigraphiques de quelques gisements sous-grotte du sud-ouest [The transition from middle to Upper Paleolithic: stratigraphie sequences of some south-west sites of France.]. Quaternaire. 8, 279–287.

Lévêque, F., 2002. Méthodes de fouilles. In: Miskovsky, J.-C. (Ed.), Geologie de la Prehistoire: methodes, techniques, applications. GeoPre, Paris, pp. 349-363.

Palma di Cesnola, A. (1965). Il Paleolitico superiore arcaico (facies uluzziana) della Grotta del Cavallo, Lecce. *Rivista Scienze Preistoriche*, *20*, 33–62.

Palma di Cesnola, A. & Messeri, P. (1967). Quatre dents humaines paléolithiques trouvées dans des cavernes de l’Italie méridionale. *Anthropologie*, *71*, 249–262.

Pradel, L., 1961. La grotte des Cottés. *L’Anthropologie*. 65, 229–258.

Rendu, W., Renou, S., Soulier, M.-C., Rigaud, S., Roussel, M., Soressi, M., 2019. Subsistence strategy changes during the Middle to Upper Paleolithic transition reveals specific adaptations of Human Populations to their environment. Scientific Reports. 9, 15817.

Rochebrune, R., *Les Troglodytes de La Gartempe. Fouilles de la grotte des Cottés*. (Imprimerie Charles Caurit, 1881).

Romagnoli, F., Baena, J., & Sarti, L. (2016). Neanderthal retouched shell tools and Quina economic and technical strategies: An integrated behaviour. *Quaternary International*, *407*, 29-44.

Rossini, M., Marciani, G., Arrighi, S., Pereira Santos, M. C., Spagnolo, V., Ronchitelli, A., et al. (2022). Less is more! Uluzzian technical behaviour at the cave site of Castelcivita (southern Italy). *Journal of Archaeological Science: Reports*, *44*, 103494. <https://doi.org/10.1016/j.jasrep.2022.103494>

Roussel, M. & Soressi, M., 2010. La Grande Roche de la Plématrie à Quinçay (Vienne). L’évolution du Châtelperronien revisitée, in J. Buisson-Catil & J. Primault (ed.) P*réhistoire entre Vienne et Charente - Hommes et sociétés du Paléolithique*: 203-219. Chauvigny: Association des Publications Chauvinoises.

Roussel, M., Soressi, M., Hublin, J.J., 2016. The Châtelperronian conundrum: Blade and bladelet lithic technologies from Quinçay, France. Journal of Human Evolution. 95, 13–32.

Soressi, M. *et al.* *Les Cottés (Vienne). Nouveaux travaux sur l’un des gisements de référence pour la transition Paléolithique moyen/supérieur*. (Association des Publications Chauvinoises, 2010).

Talamo, S., Soressi, M., Roussel, M., Richards, M. & Hublin, J.-J., 2012. A radiocarbon chronology for the complete Middle to Upper Palaeolithic transitional sequence of Les Cottés (France). *Journal of Archaeological Science* **39,** 175–183.

Welker, F., Soressi, M., Rendu, W., Hublin, J.J., Collins, M., 2015. Using ZooMS to identify fragmentary bone from the Late Middle/Early Upper Palaeolithic sequence of Les Cottés, France. Journal of Archaeological Science. 54, 279–286.

Zanchetta, G., Giaccio, B., Bini, M., & Sarti, L. (2018). Tephrostratigraphy of Grotta del Cavallo, Southern Italy: Insights on the chronology of Middle to Upper Palaeolithic transition in the Mediterranean. *Quaternary Science Reviews*, *182*(January), 65–77. https://doi.org/10.1016/j.quascirev.2017.12.014
